# Supplementary material for: Substituting effect of Ce3+ on the AlPO-11 molecular sieve
Source: Royal Society of Chemistry journal article supplement (doi:10.1039/c5cy01938a), 2015-12-21
Supplement: c5cy01938a1.pdf [file c5cy01938a1.pdf]

## **Substituting Effect of Ce<sup>3+</sup> on AlPO-11 Molecular Sieve**

Yuxiang Liu, <sup>a</sup> Lu Xu, <sup>a</sup> Lianming Zhao, <sup>b</sup> Ling Wei, <sup>a</sup> Xinmei Liu,<sup>\*,a</sup> and Zifeng

Yan<sup>a</sup>

<sup>a</sup> *State Key Laboratory for Heavy Oil Processing, Key Laboratory of Catalysis, CNPC, China University of Petroleum, Qingdao 266580, China*

<sup>b</sup> *College of Science, China University of Petroleum, Qingdao 266555, China*

*Corresponding Author: \*E-mail: lxmei@upc.edu.cn*

## Supplementary Information

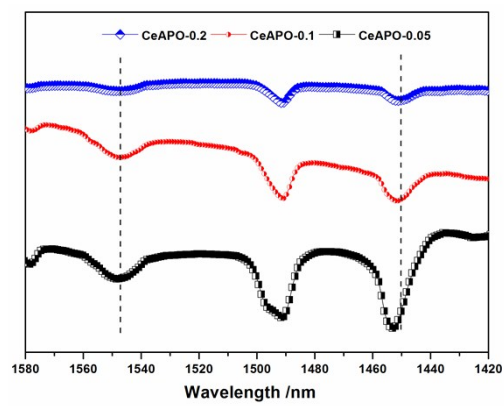

Fig. S1 Py-FTIR spectra of samples

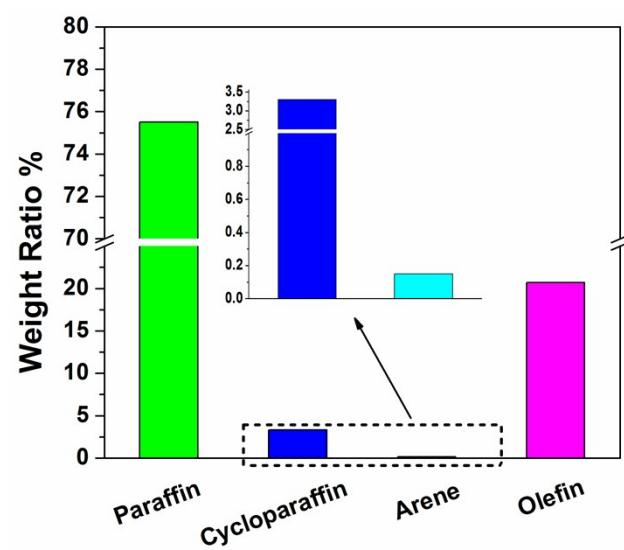

Figure. S2 PONA composition of products of hybrid catalyst: Y-30%: AlPO-11 = 10:1 (wt%)
